# Supplementary material for: Surface mass balance downscaling through elevation classes in an Earth System Model: analysis, evaluation and impacts on the simulated climate
Source: Copernicus journal article supplement (doi:10.5194/tc-2019-122), 2019-06-21
Supplement: Supplementary file 1 [file tc-2019-122-supplement.pdf]

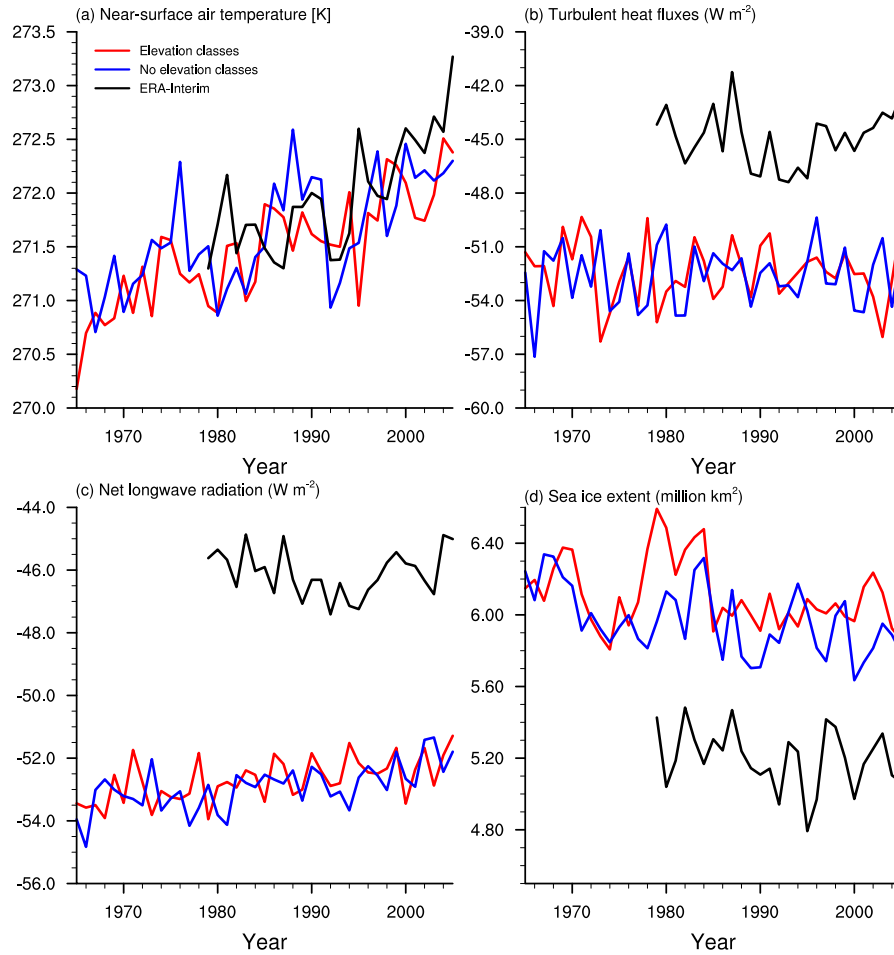

**Figure S1.** Annual means of selected climate variables in the simulations EC-1K (“No elevation classes”, blue) and EC-6K (“elevation classes”, red), and ERA-Interim (only 1979-2005, black) for reference. The data are area-weighted averages (integrated for sea-ice) for the region in Fig. 5.
